# Supplementary material for: Functional labeling of individualized postsynaptic neurons using optogenetics and trans-Tango in Drosophila (FLIPSOT)
Source: PubMed Central journal article supplement (PMC10965055; doi:10.1371/journal.pgen.1011190), 2024-03-14
Supplement: pgen.1011190.s001.pdf [file pgen.1011190.s001.pdf]

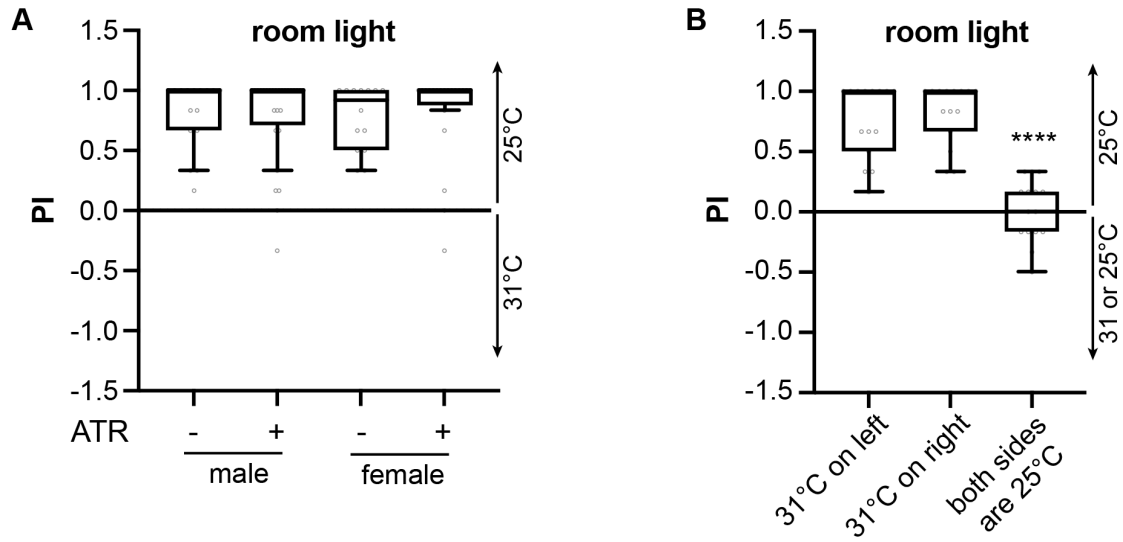

S1 Fig. PI is not affected by fly gender, dietary retinal (ATR), or whether 31°C is on the left or right.

(A) PI of the indicated genders that were raised with (+) or without (-) dietary retinal (ATR).  $n = 14-28$ ; Kruskal-Wallis test followed by Dunn's multiple comparisons test.

(B) PI from tests that 31°C was on the left, on the right or both sides were 25°C.  $n = 15$ ; data represent means  $\pm$  SEM; Kruskal-Wallis test followed by Dunn's multiple comparisons test; \*\*\*\*,  $p < 0.0001$ .
