# Supplementary material for: Functional labeling of individualized postsynaptic neurons using optogenetics and trans-Tango in Drosophila (FLIPSOT)
Source: PubMed Central journal article supplement (PMC10965055; doi:10.1371/journal.pgen.1011190), 2024-03-14
Supplement: pgen.1011190.s002.pdf [file pgen.1011190.s002.pdf]

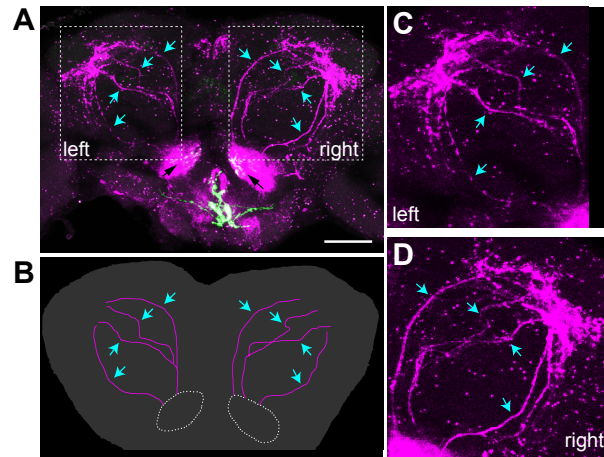

S2 Fig. *Gr28b.d-Gal4* drives *trans*-Tango to label postsynaptic neurons of HCs.

(A) In flies bearing *trans*-Tango components, driving ligands and GFP expressing in VP2 (black arrow) of the AL by *Gr28b.d-Gal4* results in mtdTomato expression (magenta) in postsynaptic LNs and PNs (cyan arrow). Scale bar: 50  $\mu$ m.

(B) Illustration of PNs.

(C) Left PNs.

(D) Right PNs.
