# Supplementary material for: Functional labeling of individualized postsynaptic neurons using optogenetics and trans-Tango in Drosophila (FLIPSOT)
Source: PubMed Central journal article supplement (PMC10965055; doi:10.1371/journal.pgen.1011190), 2024-03-14
Supplement: pgen.1011190.s003.pdf [file pgen.1011190.s003.pdf]

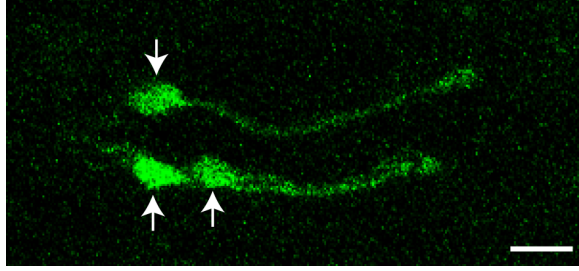

S3 Fig. *Ir21a-QF2w* labels three neurons in each DOG. Genotype: *Ir21a-QF2w/QUAS-GCaMP3*. White arrow: cell body. Scale bar: 10  $\mu$ m.
