# Supplementary material for: Functional labeling of individualized postsynaptic neurons using optogenetics and trans-Tango in Drosophila (FLIPSOT)
Source: PubMed Central journal article supplement (PMC10965055; doi:10.1371/journal.pgen.1011190), 2024-03-14
Supplement: pgen.1011190.s005.pdf [file pgen.1011190.s005.pdf]

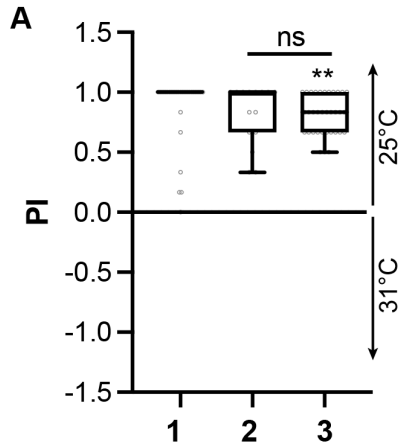

1. *wt* (2-7d)
2. *wt* (~10d)
3. *HC>FLIPSOTi* (~10d)

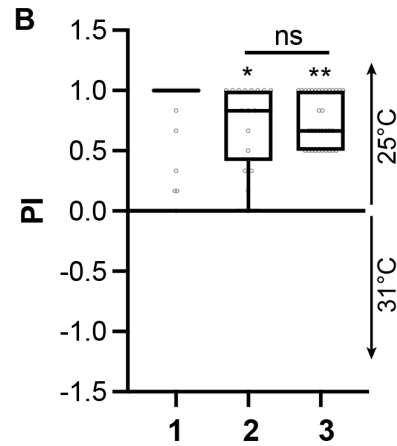

1. *wt* (2-7d)
2. *wt* (~21d)
3. *HC>FLIPSOTa* (~21d)

S5 Fig. The rapid warm avoidance of old flies.

(A) PI of the indicated genotypes and ages.  $n = 15-34$ ; Mann-Whitney test comparing to *wt* (2-7d) or the indicated group; \*\*,  $p < 0.01$ ; ns, not significant. The behavioral datasets of *wt* (2-7d) and *HC>FLIPSOTi* (~10d) are the same as in Fig 5B.

(B) PI of the indicated genotypes and ages.  $n = 17-34$ ; Mann-Whitney test comparing to *wt* (2-7d) or the indicated group; \*,  $p < 0.05$ ; \*\*,  $p < 0.01$ ; ns, not significant. The behavioral datasets of *wt* (2-7d) and *HC>FLIPSOTa* (~21d) are the same as in Fig 6B.
